# Supplementary material for: Identification of&nbsp;Common Mechanisms and Key Genes in the Chronic Obstructive Pulmonary Disease and Acute Myocardial Infarction
Source: Research Square preprint supplement (doi:10.21203/rs.3.rs-259286/v1), 2021-03-11
Supplement: Supplementary file 2 [file f78f7669bae9f9a2428af1fa.xls]

## Sheet: Sheet1
gene symbol
PPIAL4A
SVIL
PFKFB3
B4GALT5
JUNB
CXCR6
MMP9
MAEA
C5AR1
S100A12
PTPRE
CSNK1D
HK3
LILRB2
OSM
DYRK2
IRS2
RPL24
CLEC4E
DRAM1
KIAA0226L
TUBB
CTSS
CCND2
CRISPLD2
LMNB1
F5
ALPL
ID3
FKBP5
MXD1
ERBB2
PRPF19
CHI3L2
BOLA3
CLC
FBXO31
RGL4
SRGN
FGFBP2
CACNA1E
HSP90B1
APAF1
NAIP
CYP1B1
ZNF395
NFKBIZ
LAX1
MAP3K3
NPM1
SOCS3
CCR6
WLS
IL1R2
CYBRD1
CNST
RPL5
MCL1
SLC45A4
SLC43A2
KIAA0319L
RPL17
IL1RN
ANKRD22
CAPZA2
